# Supplementary material for: Insights into the working mechanism of cathode interlayers in polymer solar cells via [(C8H17)4N]4[SiW12O40]
Source: Royal Society of Chemistry journal article supplement (doi:10.1039/c6ta08268h), 2016-01-01
Supplement: c6ta08268h1.pdf [file c6ta08268h1.pdf]

## Supporting Information

### Insights into Working Mechanism of Cathode Interlayer in Polymer Solar Cells via [(C<sub>8</sub>H<sub>17</sub>)<sub>4</sub>N]<sub>4</sub>[SiW<sub>12</sub>O<sub>40</sub>]

Youchun Chen,<sup>a</sup> Shan Wang,<sup>a</sup> Lingwei Xue,<sup>b</sup> Zhiguo Zhang,<sup>b</sup> Haolong Li,<sup>\*, a</sup> Lixin Wu,<sup>a</sup> Yue Wang,<sup>a</sup> Fenghong Li,<sup>\*, a</sup> Fengling Zhang<sup>c</sup> and Yongfang Li<sup>b</sup>

<sup>a</sup>State Key Laboratory of Supramolecular Structure and Materials, Jilin University, Changchun 130012, P. R. China

\*E-mail: [fhli@jlu.edu.cn](mailto:fhli@jlu.edu.cn); [hl\\_li@jlu.edu.cn](mailto:hl_li@jlu.edu.cn)

<sup>b</sup>Beijing National Laboratory for Molecular Sciences, CAS Key Laboratory of Organic Solids, Institute of Chemistry, Chinese Academy of Sciences, Beijing 100190, P. R. China

<sup>c</sup>Department of Physics, Chemistry and Biology (IFM), Linköping University, Linköping 58183, Sweden

Table of the contents:

1. Synthesis and characterization of TAsiW-12.
2. Ultraviolet-visible absorption spectrum of TAsiW-12 film (Figure S1).
3. Ionized potential measurements of PDINO film and TAsiW-12 film using UPS (Figure S2).
4. Conductivity measurement of TAsiW-12 film (Figure S3).
5. Atom force microscopy (AFM) images of H<sub>4</sub>SiW<sub>12</sub>O<sub>40</sub>, TOAB and TAsiW-12 films on the PTB7:PC<sub>71</sub>BM (Figure S4).
6. Scanning electron microscopy (SEM) and energy dispersive spectroscopy (EDS) images of TOAB and TAsiW-12 films on the PTB7:PC<sub>71</sub>BM (Figure S5).
7. Performance parameters of different PSCs with error bars (Figure S6).
8. Device stability of the PTB7:PC<sub>71</sub>BM based PSCs with TAsiW-12/Al as cathode (Figure S7 and Table S1).
9. *J-V* curves of the PSCs based on PTB7:PC<sub>71</sub>BM with different cathodes in the dark (Figure S8 and Equation S1).
10. Transient photocurrent measurements of the PSCs based on PTB7:PC<sub>71</sub>BM (Figure S9).
11. Mobility measurements of electron and hole using space charge limited current (SCLC) method (Figure S10 and Equation S2).
12. Work function measurements of Al, Al/LiF, Al/PDINO and Al/TAsiW-12 using UPS (Figure S11).

13. Certified device performance of the PSC based on PTB7-Th:PC<sub>71</sub>BM with TAsiW-12/Al as a cathode (Figure S12).
14. *J-V* curves of the PSCs based on PCDTBT:PC<sub>71</sub>BM with TAsiW-12 (Figure S13 and Table S2).
15. X-ray photoemission spectroscopy (XPS) measurements of Ag/TAsiW-12 (Figure S14).
16. UPS measurements of ITO/TAsiW-12 (Figure S15).

### 1. Synthesis and characterization of TAsiW-12.

0.33 g  $(C_8H_{17})_4NBr$  and 0.50 g  $H_4SiW_{12}O_{40}$  were dissolved in 15 mL methanol, respectively, and the molar ratio of the organic cations to  $H_4SiW_{12}O_{40}$  was controlled by  $\sim 3.5:1$  (charge ratio:  $\sim 3.5:4$ ). Under vigorous stirring at room temperature, the  $(C_8H_{17})_4NBr$  solution was added dropwise to the  $H_4SiW_{12}O_{40}$  solution with no significant change in the solution. After stirring at room temperature for 2 h, 30 mL  $H_2O$  was added dropwise, generating a white precipitate. The resulted precipitate was filtered, washed with 30 mL  $H_2O$  for three times and then dried in vacuum to give TAsiW-12( $[(C_8H_{17})_4N]_4[SiW_{12}O_{40}]$ ). Elemental analysis (%) calculated for  $C_{128}H_{272}N_4SiW_{12}O_{40}$  ( $4741.7 \text{ g mol}^{-1}$ ): C 32.42, H 5.78, N 1.18; Found: C 32.26, H 5.50, N 1.18, corresponding to the chemical formula  $[(C_8H_{17})_4N]_4[SiW_{12}O_{40}]$ .

### 2. Ultraviolet-visible absorption spectrum of TAsiW-12 film.

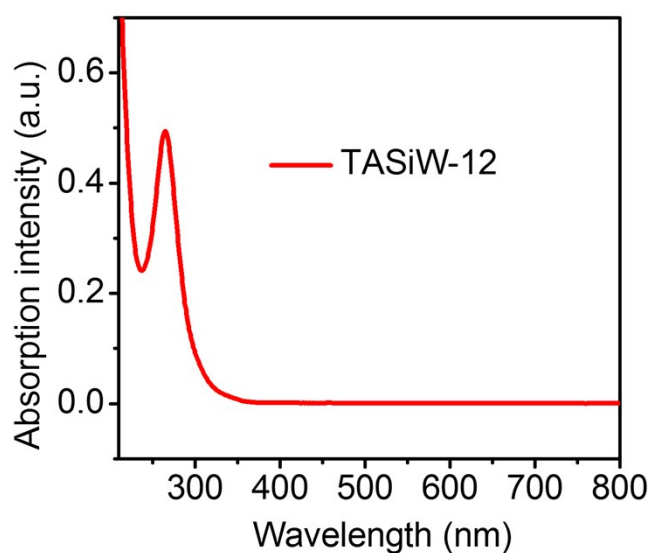

**Figure S1.** Ultraviolet-visible absorption spectrum of TAsiW-12 film.

3. Ionized potential measurements of PDINO film and TASIW-12 film using UPS.

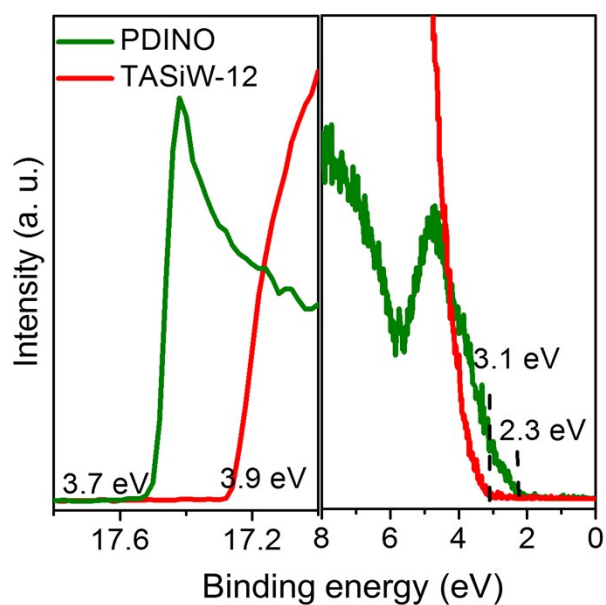

**Figure S2.** UPS spectra of 15 nm PDINO and 15 nm TASIW-12 films on ITO in the secondary electron cutoff region (left) and valence band region (right). HOMO versus vacuum level of PDINO is 6.0 eV and valence band of TASIW-12 is 7.0 eV.

4. Conductivity measurement of TASIW-12 film.

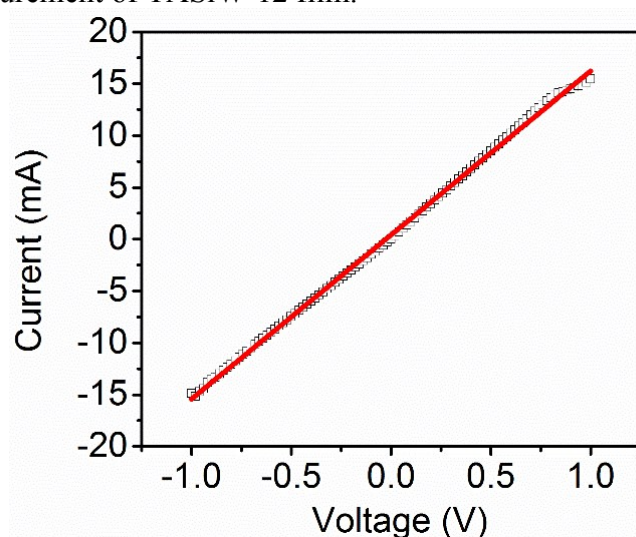

**Figure S3.** I-V curve of the device for ITO/TASIW-12 (23 nm)/Al in the dark. The conductivity of TASIW-12 is  $8.76 \times 10^{-5}$  S/m.

5. AFM images of  $\text{H}_4\text{SiW}_{12}\text{O}_{40}$ , TOAB and TAsiW-12 on the PTB7:PC<sub>71</sub>BM.

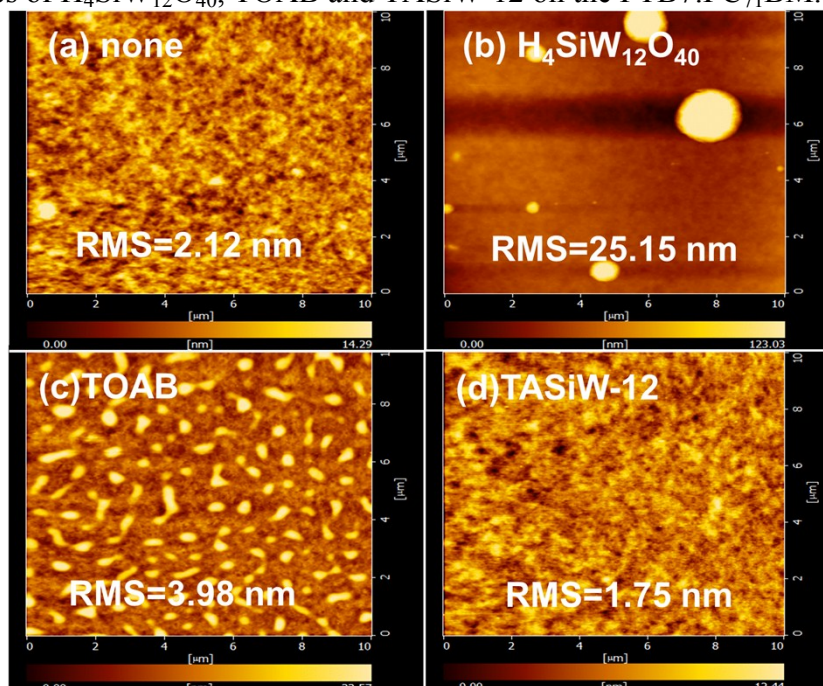

**Figure S4.** AFM images of the PTB7:PC<sub>71</sub>BM film (a),  $\text{H}_4\text{SiW}_{12}\text{O}_{40}$  on the PTB7:PC<sub>71</sub>BM film (b), TOAB on the PTB7:PC<sub>71</sub>BM film (c) and TAsiW-12 on PTB7:PC<sub>71</sub>BM film (d).

6. SEM and SEM-EDS images of TAsiW-12 on the PTB7:PC<sub>71</sub>BM.

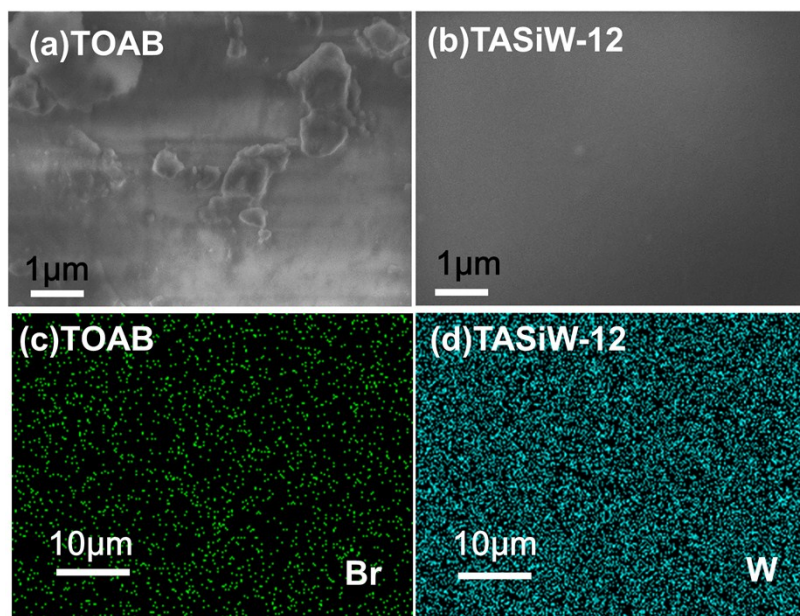

**Figure S5.** SEM and SEM-EDS images of TOAB on the PTB7:PC<sub>71</sub>BM film (a for SEM and c for SEM-EDS) and TAsiW-12 on PTB7:PC<sub>71</sub>BM film (b for SEM and d for SEM-EDS). The green dots (c) signify bromine element; The light blue dots (d) signify tungsten element.

7. Performance parameters of different PSCs with error bars.

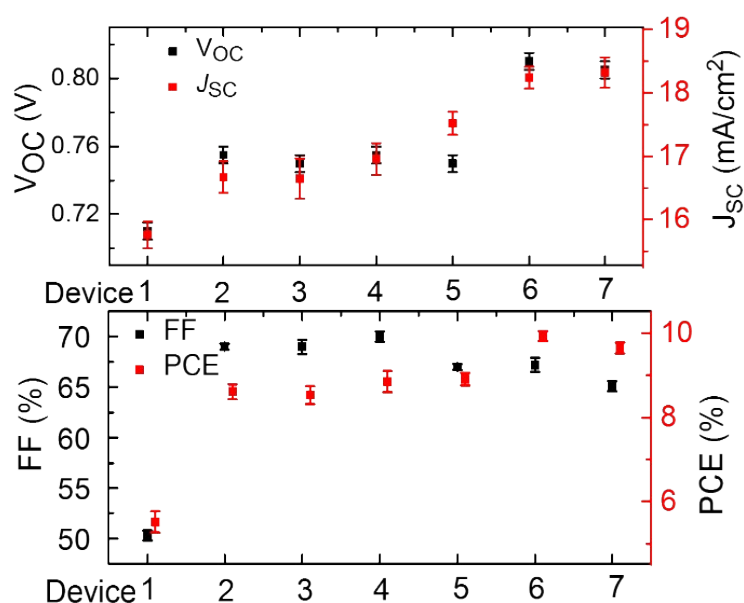

**Figure S6.** Performance parameters of different PSCs with error bars.

Device 1: ITO/PEDOT:PSS/PTB7:PC<sub>71</sub>BM/Al,

Device 2: ITO/PEDOT:PSS/PTB7:PC<sub>71</sub>BM/LiF/Al,

Device 3: ITO/PEDOT:PSS/PTB7:PC<sub>71</sub>BM/PDINO/Al,

Device 4: ITO/PEDOT:PSS/PTB7:PC<sub>71</sub>BM/TAsiW-12/Al,

Device 5: ITO/PEDOT:PSS/PTB7:PC<sub>71</sub>BM/TAsiW-12/Ag

Device 6: ITO/PEDOT:PSS/PTB7-Th:PC<sub>71</sub>BM/TAsiW-12/Al,

Device 7: ITO/PEDOT:PSS/PTB7-Th:PC<sub>71</sub>BM/TAsiW-12/Ag.

8. Device stability of the PTB7:PC<sub>71</sub>BM based PSCs with TAsiW-12/Al as cathode.

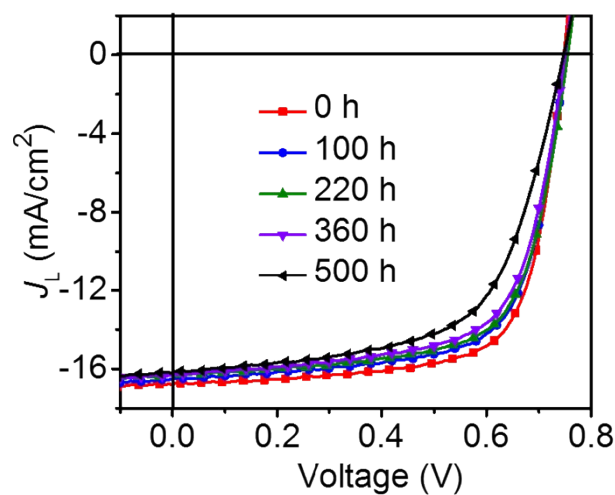

**Figure S7.** *J*-*V* characteristics of PTB7:PC<sub>71</sub>BM based PSCs with TAsiW-12/Al measured at different time after encapsulation.

**Table S1.** Photovoltaic parameters of TB7:PC<sub>71</sub>BM based PSCs with TAsiW-12/Al at different time after encapsulation.

| Time (h) | V <sub>OC</sub> (V) | J <sub>SC</sub> (mA cm <sup>-2</sup> ) | FF (%) | PCE (%) |
|----------|---------------------|----------------------------------------|--------|---------|
| 0        | 0.745               | 16.78                                  | 71.6   | 8.95    |
| 100      | 0.745               | 16.53                                  | 69.4   | 8.55    |
| 220      | 0.750               | 16.32                                  | 69.0   | 8.45    |
| 360      | 0.750               | 16.33                                  | 67.1   | 8.22    |
| 500      | 0.745               | 16.11                                  | 65.3   | 7.84    |

9.  $J$ - $V$  curves of the PSCs based on PTB7:PC<sub>71</sub>BM with different cathodes in the dark.

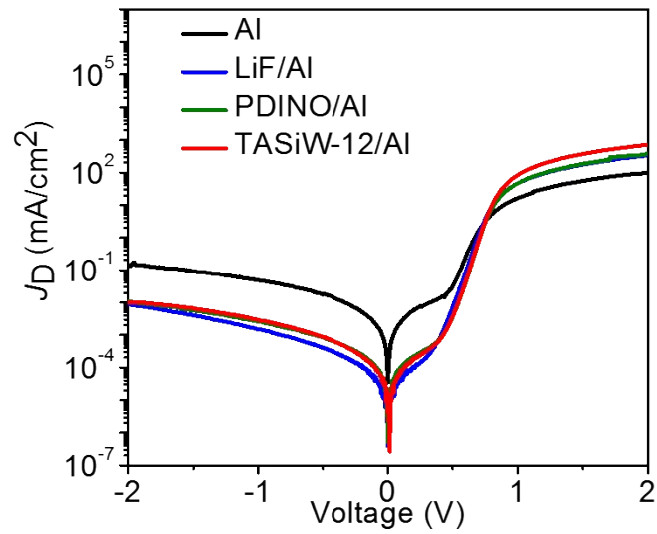

**Figure S8.**  $J$ - $V$  curves of the PSCs based on PTB7:PC<sub>71</sub>BM with different cathodes in the dark.

### Equation S1

$$J_{inj} = J_{0,n} \exp\left(\frac{qV}{nTk_B}\right)$$

$J_{0,n}$  is reverse saturation dark current density,  $n$  is diode ideality factor,  $k_B$  is Boltzmann constant,  $T$  is temperature,  $q$  is elementary charge.  $J_{inj}$  is current density of PSCs in the dark.

10. Transient photocurrent measurements of the PSCs based on PTB7:PC<sub>71</sub>BM.

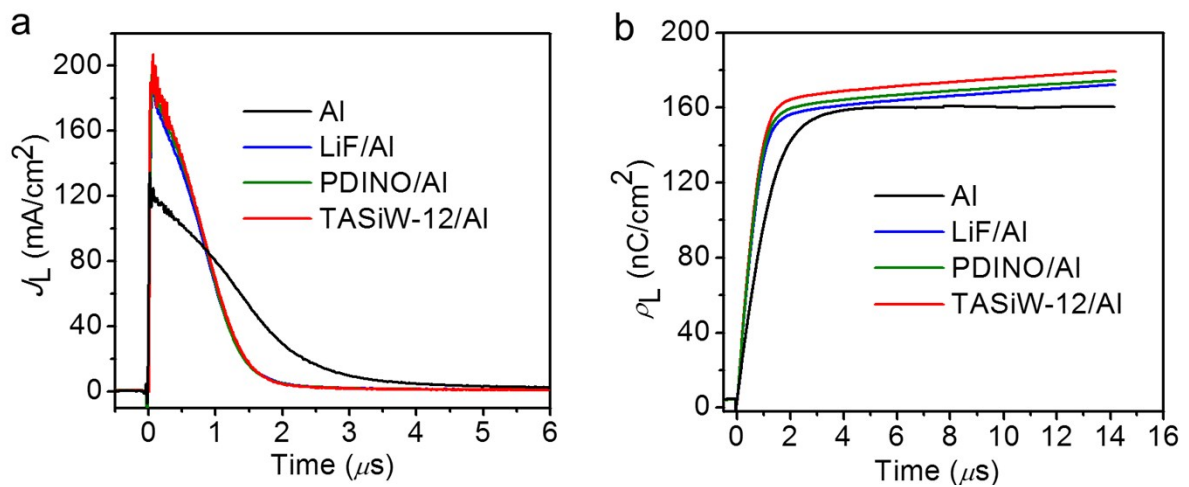

**Figure S9.** (a) Transient photocurrent and (b) the integrated photocurrent of PTB7:PC<sub>71</sub>BM based devices with different cathodes.



11. Mobility measurements of electron and hole using space charge limited current (SCLC) method.

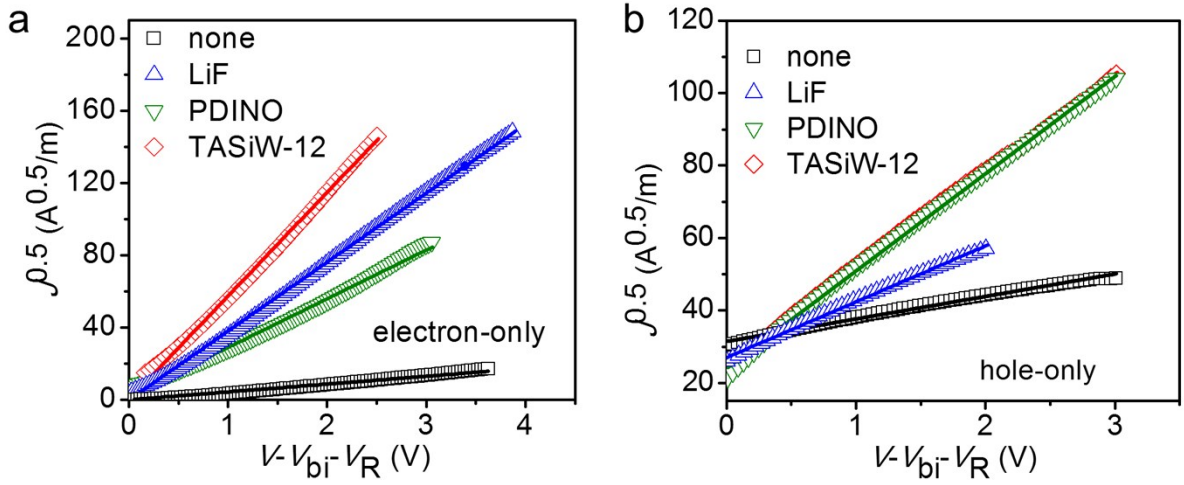

**Figure S10.**  $J^{0.5}$  versus  $V - V_{bi} - V_R$  plots for the electron-only (a) and the hole-only (b) devices with different CILs.

### Equation S2

$$J = \frac{9}{8} \epsilon_0 \epsilon_r \mu \frac{V^2}{L^3}$$

$\epsilon_0$  is the permittivity of free space,  $\epsilon_r$  is the dielectric constant of the active layer,  $\mu$  is the carrier mobility,  $V$  is the voltage drop across the device,  $L$  is the active layer thickness.

12. Work function measurements of Al, Al/LiF, Al/PDINO and Al/TASIW-12 using UPS.

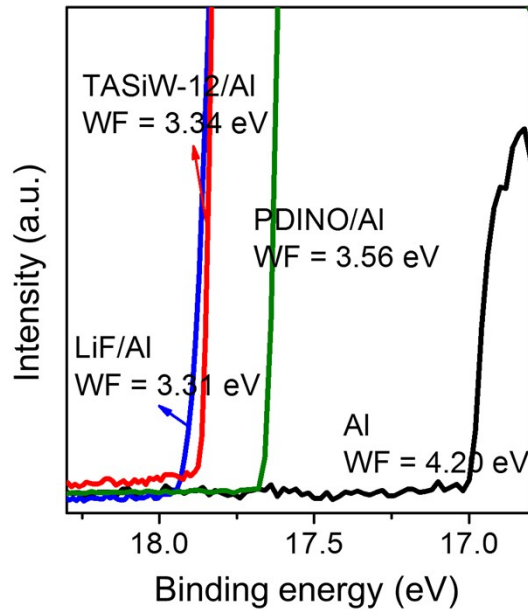

**Figure S11.** UPS spectra of bare Al, Al covered by 1 nm LiF, 10 nm PDINO and 10 nm TASIW-12 in the secondary electron cutoff region.

13. Certified device performance of the PSC based on PTB7-Th:PC<sub>71</sub>BM with TASIW-12/Al as a cathode.

中国计量科学研究院 中国计量科学研究院

**校准证书**  
Calibration Certificate

证书编号: GXtc2016-0748  
Certificate No.

客户名称: 吉林大学  
Client: Jilin University

器具名称: 聚合物太阳能电池  
Instrument: Polymer Solar Cell

型号/规格: /  
Type/Model: /

出厂编号: 3-11  
Serial No.: 3-11

生产厂家: /  
Manufacturer: /

客户地址: 吉林省长春市前进大街 2699 号吉林大学超分子结构与材料国家重点实验室  
Address: 2699 Qianjin Avenue, Changchun, Jilin Province, China

校准日期: 2016-04-27  
Date of calibration: 2016-04-27

批准人:   
Approved by:

校准专用章

中国计量科学研究院是国家最高的计量科学研究中心和国家级法定计量技术机构。1999 年授权签署了国际计量委员会 (CIPM)《国家计量基(标)准和国家计量院签发的校准与测量证书互认协议》(CIPM MRA)。The National Institute of Metrology (NIM) is China's national metrology institute (NMI) and a state-level legal metrology institute. NIM is China's signatory to the Mutual Recognition of National Measurement Standards and of Calibration and Measurement Certificates Issued by National Metrology Institutes (CIPM MRA) which is arranged by the International Committee of Weights and Measures (CIPM).  
中国计量科学研究院的质量管理体系符合 ISO/IEC17025 标准。通过中国合格评定国家认可委员会和亚太计量规划组织 (APMP) 联合评审的校准和测量能力 (CMCs) 在国际计量局 (BIPM) 关键比对数据库日公布。NIM's quality management system meets requirements of the ISO/IEC 17025. Its Calibration and Measurement Capabilities (CMCs) that are peer reviewed both by China National Accreditation Service for Conformity Assessment (CNAS) and the Asia Pacific Metrology Programme (APMP) are published in the International Bureau of Weights and Measures (BIPM) Key Comparison Database (KCDB).  
2011 年, 中国计量科学研究院和中国合格评定国家认可委员会就认可领域的技术评价活动签署了谅解备忘录, 承认中国计量科学研究院的计量支撑作用和出具的校准/检测结果的溯源效力。NIM and CNAS signed a Memorandum of Understanding (MOU) for Recognition of Technical Assessment in Laboratory Accreditation Field in 2011, in which CNAS recognizing the technical supporting role of NIM in laboratory accreditation and the traceability of NIM's calibration / test results.  
校准结果不确定度的评估和表述均符合 JJF1059 系列标准的要求。The evaluation and expression of uncertainty of the calibration results are in line with the requirements of JJF1059 series standards.

校准所依据的技术文件 (代号、名称) Reference documents (Code, Name)  
Measurement of photovoltaic current-voltage characteristics (IEC60904-1)  
太阳能电池校准规范: 光电性能 (NIM-ZY-GX-TT-402) (Calibration Specification of Solar Cells: Photoelectric Properties)

校准环境条件及地点 Calibration place and environment  
温度 Temperature: °C 地点 Location:  
湿度 Humidity: %RH 其它 Others:

校准使用的计量基(标)准装置(含标准物质)主要仪器  
Reference Standards (Including the Reference Material) / Instruments used

| 名称<br>Name                              | 测量范围<br>Measurement Range                                                 | 不确定度/<br>准确度等级<br>Uncertainty/Accuracy                                  | 证书编号<br>Certificate No. | 证书有效期至<br>Due Date<br>(YYYY-MM-DD) |
|-----------------------------------------|---------------------------------------------------------------------------|-------------------------------------------------------------------------|-------------------------|------------------------------------|
| 太阳能电池光电性能校准装置<br>Measurement Standard   | $I_{sc}$ : (0.1-10) A<br>$V_{oc}$ : (0.1-200)V<br>$P_{m0}$ : (0.01-500) W | $I_{sc}$ : 1.5% (k=2)<br>$V_{oc}$ : 0.5% (k=2)<br>$P_{m0}$ : 1.6% (k=2) | [2015]国量标计<br>证书第 286 号 | 2019-07-05                         |
| KG5-标准太阳能电池<br>KG5-Reference solar cell | $I_{sc}$ : (0-200) mA                                                     | 1.2% (k=2)                                                              | GXtc2016-0080           | 2017-02-26                         |

地址: 中国 北京 北三环东路 18 号  
Address: No.18 Bei San Huan Dong Lu, Beijing, P.R. China  
邮编: 100029  
Post Code: 100029  
电话: +86-10-6452569/74  
Tel: +86-10-6452569/74  
网址: http://www.nim.ac.cn  
Website: http://www.nim.ac.cn  
电子邮箱: kehufuwu@nim.ac.cn  
Email: kehufuwu@nim.ac.cn

第 2 页 共 4 页

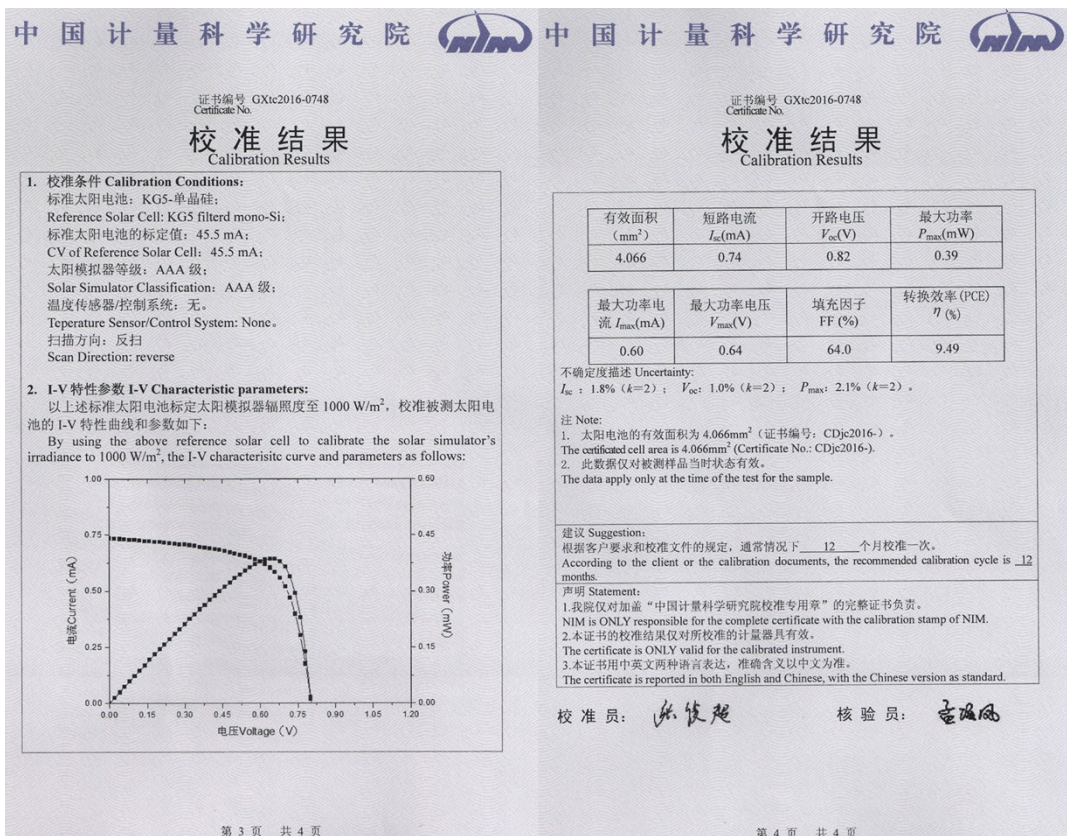

**Figure S12.** Certified J-V curve and device parameters of the PSC based on PTB7-Th:PC<sub>71</sub>BM with TAsiW-12/Al as a cathode by National institute of metrology, China.

14. J-V curves of the PSCs based on PCDTBT:PC<sub>71</sub>BM with TAsiW-12.

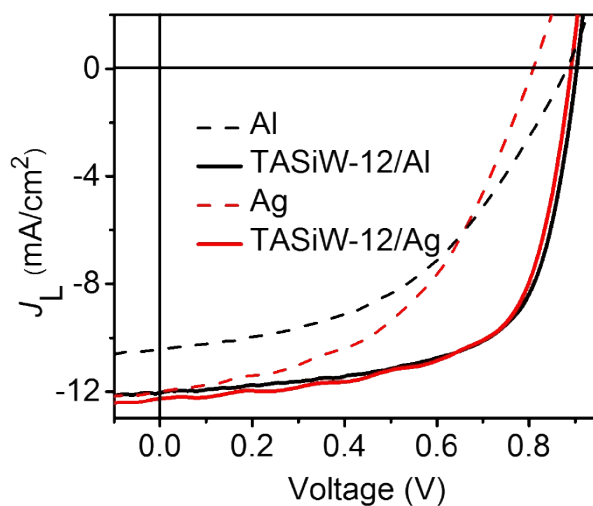

**Figure S13.** J-V curves of PCDTBT:PC<sub>71</sub>BM based PSCs with TAsiW-12/Al or Ag under 100 mW cm<sup>-2</sup> AM 1.5G illumination.

**Table S2.** photovoltaic parameters of PCDTBT:PC<sub>71</sub>BM based PSCs with different cathode.

|                            | Cathode     | V <sub>OC</sub><br>(V) | J <sub>SC</sub><br>(mA cm <sup>-2</sup> ) | FF<br>(%) | PCE<br>(%) |
|----------------------------|-------------|------------------------|-------------------------------------------|-----------|------------|
| PCDTBT:PC <sub>71</sub> BM | Al          | 0.885                  | 10.43                                     | 46.6      | 4.30       |
|                            | TASiW-12/Al | 0.905                  | 12.10                                     | 65.3      | 7.15       |
|                            | Ag          | 0.800                  | 11.98                                     | 49.3      | 4.73       |
|                            | TASiW-12/Ag | 0.890                  | 12.26                                     | 65.4      | 7.14       |

15. X-ray photoemission spectroscopy (XPS) measurements of Ag/TASiW-12.

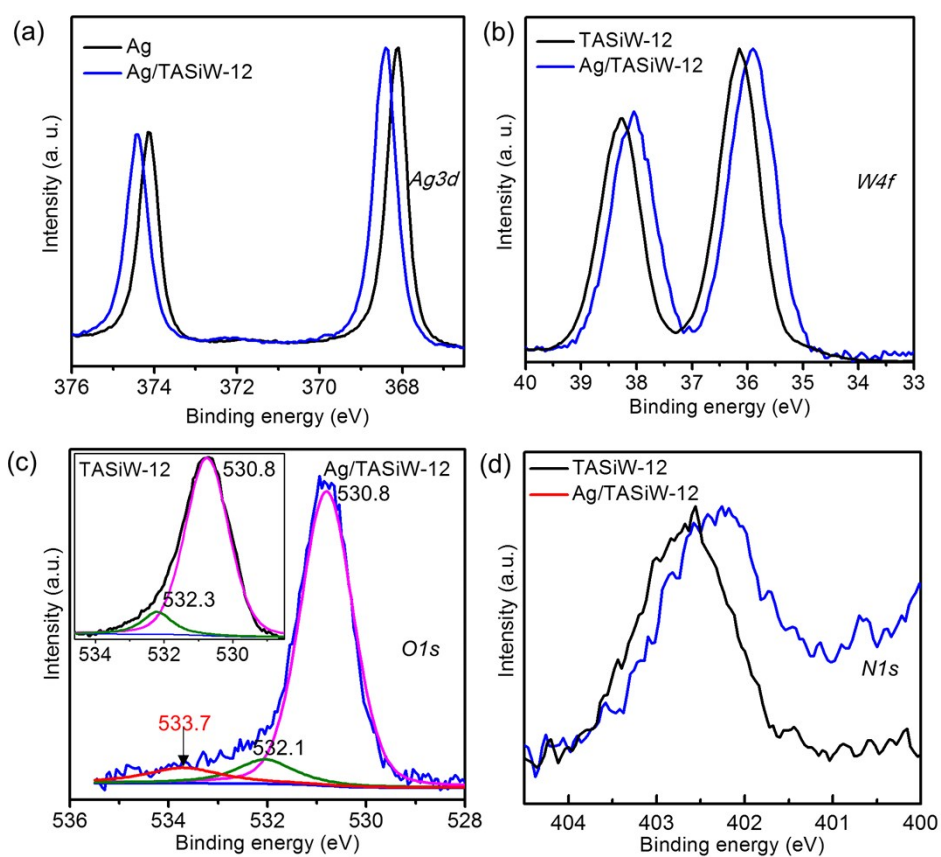

**Figure S14.** (a) *Ag3d*, (b) *W4f*, (c) *O1s* and (d) *N1s* core-level XPS spectra of Ag, Ag covered by 8 nm TASiW-12 and 40 nm TASiW-12 on ITO.

16. UPS measurements of ITO/TASiW-12.

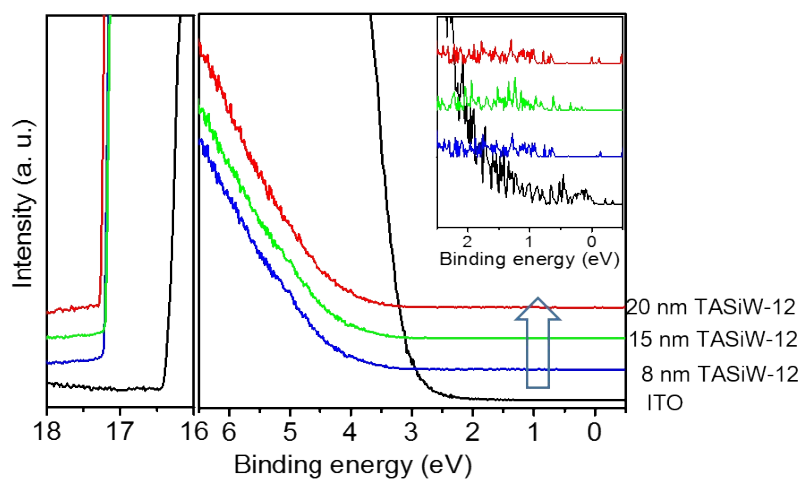

**Figure S15.** UPS spectra of ITO (black line), 8 nm (blue line), 15 nm (green line) and 20 nm (red line) TASiW-12 on ITO. Insets show the valence band spectra blown up from -0.5 to 2.5 eV.
